# Supplementary material for: Solid-state synthesis of Pt/C cathode catalysts for direct methanol fuel cells
Source: Royal Society of Chemistry journal article supplement (doi:10.1039/d3tc00889d), 2023-01-01
Supplement: d3tc00889d1.pdf [file d3tc00889d1.pdf]

## Supporting Information

### Solid-state Synthesis of Pt/C Cathode Catalysts for Direct Methanol Fuel Cells

Basanta Roul,<sup>1,2,a)</sup> Demudu Babu Gorle,<sup>1</sup> Gokul Raj,<sup>1</sup> Kanhai Kumar,<sup>1</sup> Malti Kumari,<sup>1</sup> K. K. Nanda,<sup>1,3,4,b)</sup> and S. B. Krupanidhi<sup>1,c)</sup>

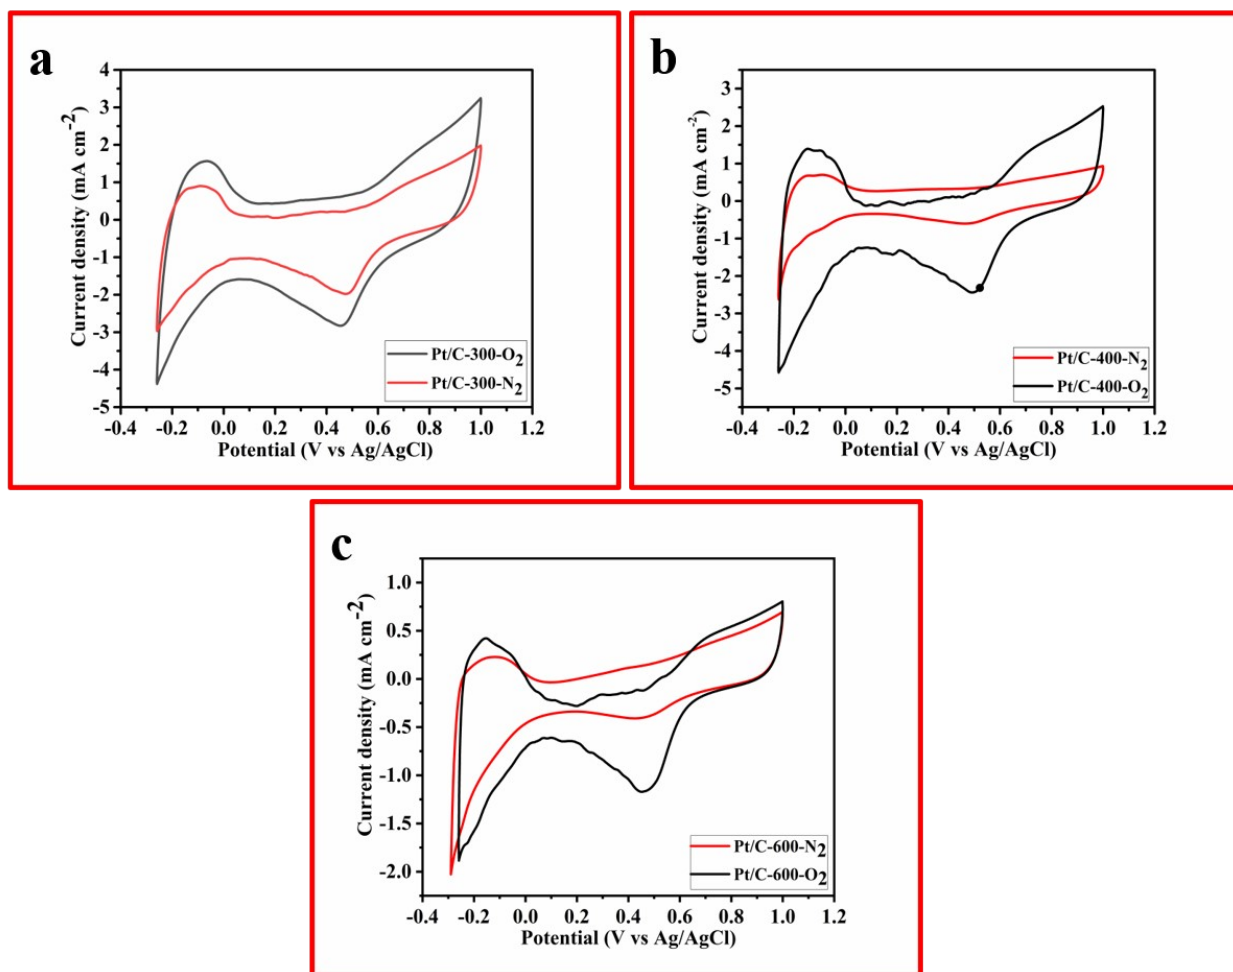

**Figure S1.** CV curves of (a) Pt/C-300, (b) Pt/C-400, and (c) Pt/C-600 in N<sub>2</sub>-saturated and O<sub>2</sub>-saturated 0.5 M H<sub>2</sub>SO<sub>4</sub> solution with a sweep rate of 50 mV s<sup>-1</sup>.
